# Supplementary material for: Copper NPs supported on hematite as magnetically recoverable nanocatalysts for a one-pot synthesis of aminoindolizines and pyrrolo[1,2-a]quinolines
Source: Royal Society of Chemistry journal article supplement (doi:10.1039/c5ra20718e), 2015-12-09

## Supporting Information

# **Copper Supported Hematite NPs as Magnetically Recoverable Nanocatalysts for One-Pot Synthesis of Aminioindolizines and Pyrrolo[1,2-a]quinolines**

U. Chinna RaJesh, V. Satya Pavan, and Diwan S. Rawat\*

Department of Chemistry, University of Delhi, Delhi 110007, India

Fax: 91-11-27667501; Tel: 91-11-27662683,\*E-mail: dsrawat@chemistry.du.ac.in

### **Table of contents**

|                                                                                    |            |
|------------------------------------------------------------------------------------|------------|
| 1. General Remarks.....                                                            | pg. S2-S2  |
| 2. Characterization of fresh and recycled Cu@Fe <sub>2</sub> O <sub>3</sub> .....  | pg. S2-S5  |
| (i) PXRD and TEM of recycled catalyst.....                                         | pg.S2-S3   |
| (ii) High resolution XPS spectra of O1s and C1s region of fresh catalyst.....      | pg.S4-S4   |
| (iii) High resolution XPS spectra of Fe2p & Cu2p of fresh & recycled catalyst..... | pg.S4-S5   |
| 3. Spectral data of known compounds and their Ref. ....                            | pg.S5-S11  |
| 4. <sup>1</sup> H NMR and <sup>13</sup> C NMR Spectra of all compounds.....        | pg.S12-S30 |



## 1. General Remarks

Powder X-ray diffraction (PXRD) patterns were recorded on Rigaku Rotaflex spectrometer at  $2\theta$  range of  $10\text{--}70^\circ$  with Cu K $\alpha$  radiation. TG-DTA analysis (Perkin Elmer, Pyris Diamond) with a heating rate of  $10^\circ\text{C}/\text{min}$  in nitrogen atmosphere was used to study the thermal decomposition behavior of the as-prepared (dried) sample with respect to  $\alpha\text{-Al}_2\text{O}_3$  as the reference. The samples were degassed at  $100^\circ\text{C}$  for 3 h prior to measurements. Fourier transform infrared (FT-IR) spectra were recorded on Perkin Elmer and the samples were prepared by mixing the powdered solids with KBr. Scanning electron microscopy (SEM) measurement was performed on a Philips XL30 electron micrograph. Transmission electron microscopy (TEM), SAED micrographs were obtained on a Joel JEM 2010 transmission electron microscope. The samples were supported on carbon-coated copper grids for the experiment. Inductively coupled plasma atomic emission spectroscopy (ICP-AES) analysis was obtained from Perkin Elmer, Optima 2000. The elemental composition and electronic structure analysis of Cu@Fe $_2$ O $_3$  was obtained from X-ray photoelectron spectra (XPS) of model SPECS and Omircon electron analyzer (EA125). The  $^1\text{H}$  NMR and  $^{13}\text{C}$  NMR spectra were measured on a Bruker AC-200 instrument using C $_6$ D $_6$  as solvent. Mass spectral data were recorded on a Jeol-Accu TOF JMS-T100LC and micromass LCT Mass Spectrometer/Data system.

## 2. Characterization of fresh and recycled Cu@Fe $_2$ O $_3$

### 2a. PXRD and TEM analysis of Cu@Fe $_2$ O $_3$ catalyst:

The powder XRD of recycled catalyst was compared with its fresh sample. There was no change in the phases of XRD pattern observed as shown in Figure S1. However, slight change in the crystallinity and grain size of Fe $_2$ O $_3$  was observed (Figure S1). Moreover, the internal morphology of recycled catalyst was analyzed by transmission electron microscopy (TEM) as shown in Figure S2. The results showed that there was no considerable change in the morphology.



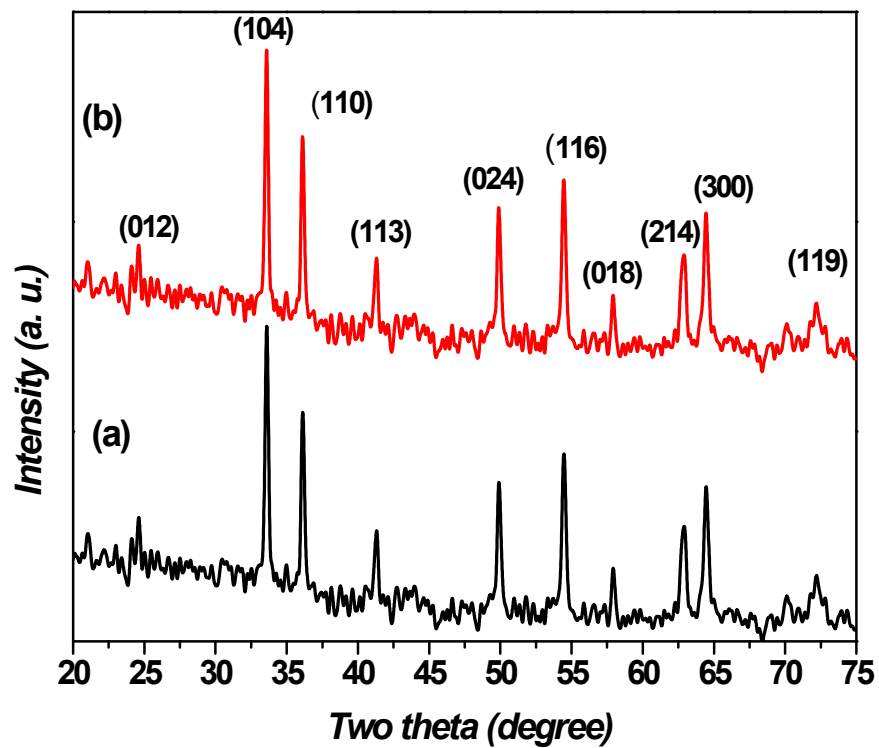

**Figure S1:** Comparison of PXRD of (a) fresh and (b) recycled  $\text{Cu}@\text{Fe}_2\text{O}_3$  catalysts

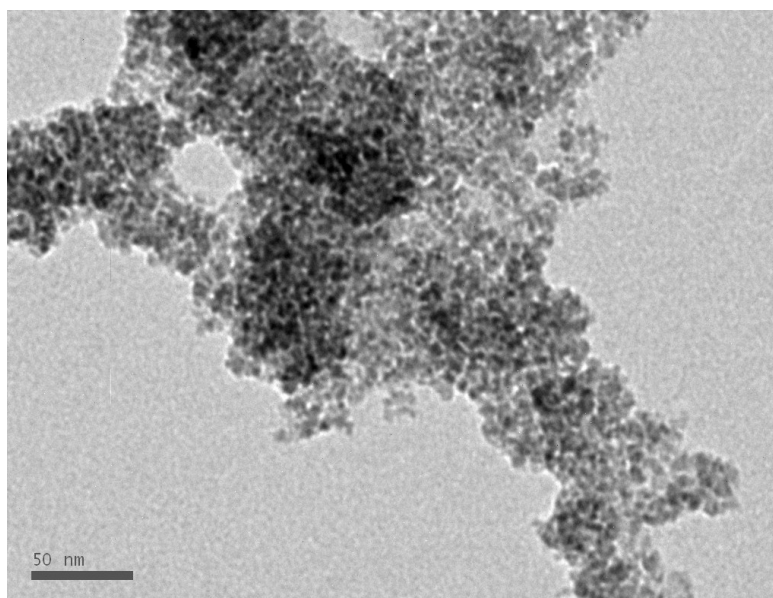

**Figure S2:** TEM image of recycled  $\text{Cu}@\text{Fe}_2\text{O}_3$  catalyst



## 2b. High resolution XPS spectra of O1s and C1s region of fresh catalyst

The high resolution spectra of O1s and C1s regions showed the presence broad peaks with binding energies 530.3 and 285.7 eV respectively as shown in Figure S3.

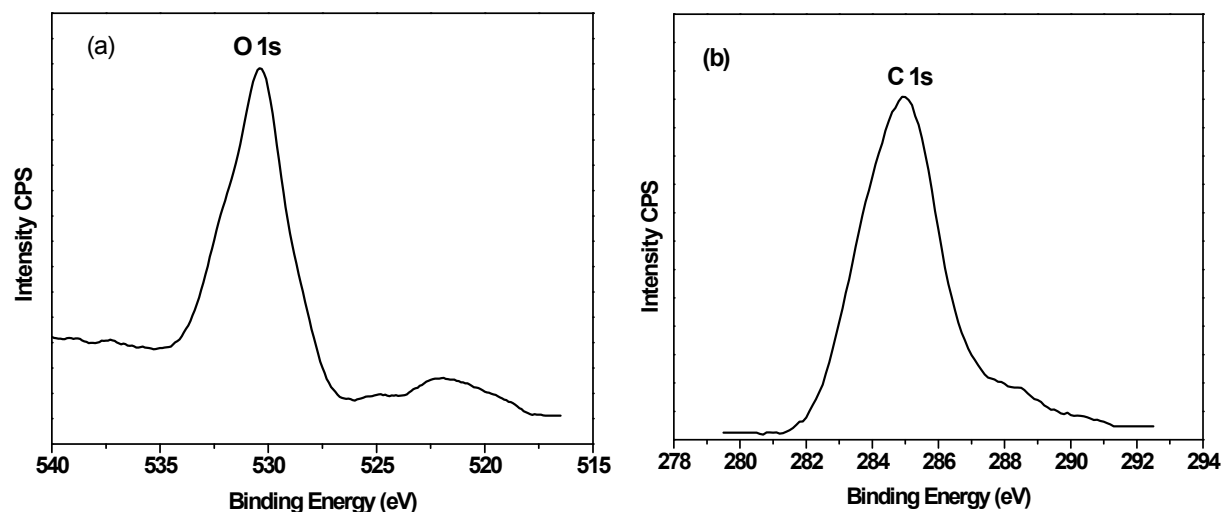

**Figure S3:** High resolution XPS spectra of (a) O1s and (b) C1s region of Cu@Fe<sub>2</sub>O<sub>3</sub> catalyst

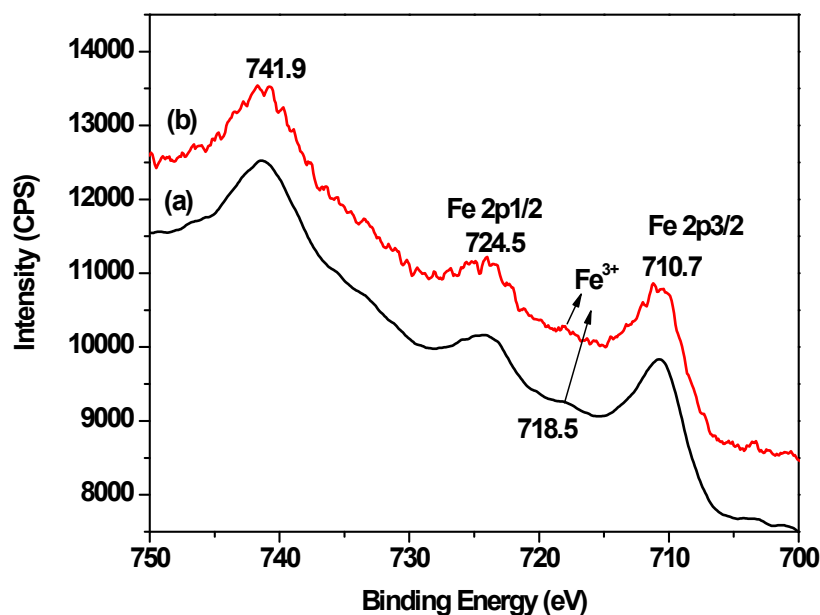

**Figure S4:** High resolution XPS spectra of Fe2p region of (a) fresh (b) recycled catalyst



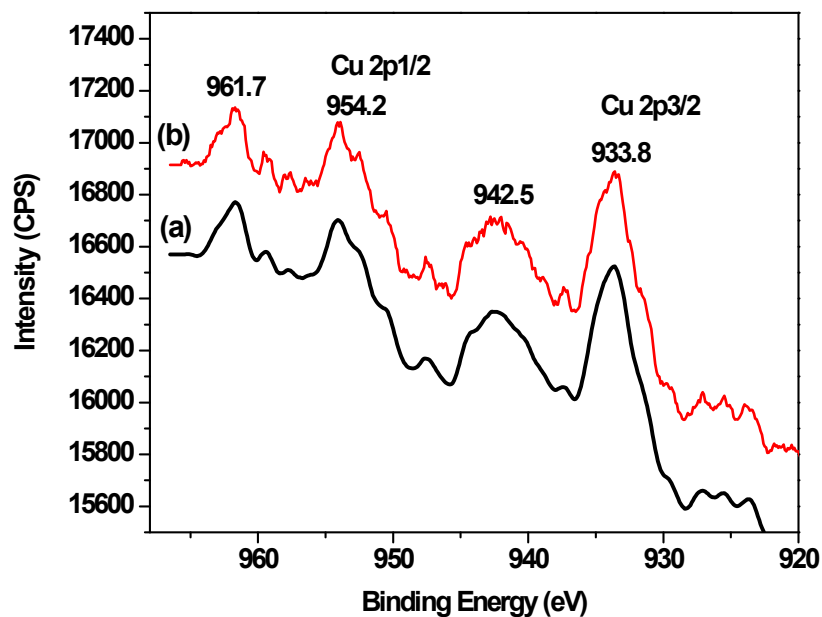

**Figure S5:** High resolution XPS spectra of Cu2p region of (a) fresh (b) recycled catalyst

### 3. Spectral data of known compounds

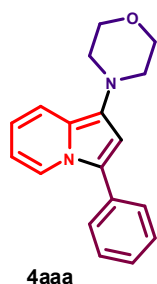

4-(3-Phenylindolizin-1-yl)morpholine (**4aaa**) [Ref 1]: Yellow oil.  $^1\text{H}$  NMR (400 MHz,  $\text{C}_6\text{D}_6$ )  $\delta$  = 7.91 (d,  $J$  = 7.6 Hz, 1H), 7.44 (d,  $J$  = 9.1 Hz, 1H), 7.35 (d,  $J$  = 7.6 Hz, 2H), 7.20 (d,  $J$  = 6.8 Hz, 2H), 7.08 (t,  $J$  = 6.8 Hz, 1H), 6.66 (s, 1H), 6.35 (t,  $J$  = 7.6 Hz, 1H), 6.04 (t,  $J$  = 7.6 Hz, 1H), 3.75 (t,  $J$  = 4.5 Hz, 4H), 2.87 (t,  $J$  = 4.5 Hz, 4H) ppm;  $^{13}\text{C}$  NMR (100 MHz,  $\text{C}_6\text{D}_6$ )  $\delta$  = 133.07, 130.62, 129.19, 127.05, 126.12, 123.00, 121.86, 118.25, 114.95, 111.18, 106.56, 67.56, 54.69 ppm.



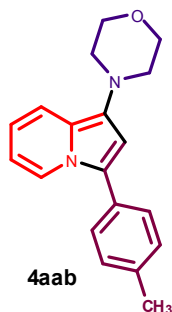

4-(3-p-tolylindolizin-1-yl)morpholine (**4aab**) [Ref 1]: Yellow oil.  $^1\text{H}$  NMR (400 MHz,  $\text{C}_6\text{D}_6$ )  $\delta$  = 7.94 (d,  $J$  = 6.8 Hz, 1H), 7.44 (d,  $J$  = 8.3 Hz, 1H), 7.29 (d,  $J$  = 8.3 Hz, 2H), 7.02 (d,  $J$  = 7.6 Hz, 2H), 6.67 (s, 1H), 6.35 (t,  $J$  = 7.6 Hz, 1H), 6.04 (t,  $J$  = 6.8 Hz, 1H), 3.75 (t,  $J$  = 4.5 Hz, 4H), 2.87 (t,  $J$  = 4.5 Hz, 4H), 2.15 (s, 3H) ppm;  $^{13}\text{C}$  NMR (100 MHz,  $\text{C}_6\text{D}_6$ )  $\delta$  = 136.60, 130.52, 130.19, 129.83, 125.70, 123.03, 121.85, 118.16, 114.66, 110.93, 106.16, 67.52, 54.66, 21.15 ppm.

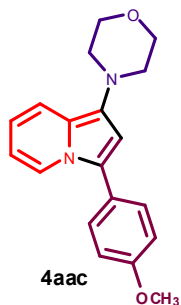

4-(3-(4-methoxyphenyl)indolizin-1-yl)morpholine (**4aac**) [Ref 1]: Yellow oil.  $^1\text{H}$  NMR (400 MHz,  $\text{C}_6\text{D}_6$ )  $\delta$  = 7.90 (d,  $J$  = 7.6 Hz, 1H), 7.47 (d,  $J$  = 8.3 Hz, 1H), 7.28 (d,  $J$  = 8.3 Hz, 2H), 6.82 (d,  $J$  = 8.3 Hz, 2H), 6.66 (s, 1H), 6.36 (t,  $J$  = 6.8 Hz, 1H), 6.08 (t,  $J$  = 6.8 Hz, 1H), 3.76 (t,  $J$  = 4.5 Hz, 4H), 3.34 (s, 3H), 2.90 (t,  $J$  = 4.5 Hz, 4H) ppm;  $^{13}\text{C}$  NMR (100 MHz,  $\text{C}_6\text{D}_6$ )  $\delta$  = 159.31, 130.38, 129.85, 125.55, 122.97, 121.83, 118.23, 114.75, 114.55, 110.93, 106.03, 67.62, 54.92, 54.77 ppm.

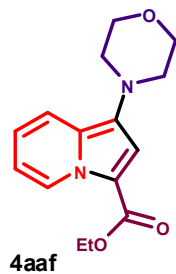



Ethyl 1-morpholinoindolizine-3-carboxylate (**4aaf**) [Ref 1]: White solid. mp: 115-117 °C;  $^1\text{H}$  NMR (400 MHz,  $\text{C}_6\text{D}_6$ )  $\delta$  = 7.97 (d,  $J$  = 7.6 Hz, 1H), 7.03 (s, 1H), 7.02 (d,  $J$  = 8.3 Hz, 1H), 6.34 (t,  $J$  = 7.6 Hz, 1H), 6.18 (t,  $J$  = 6.8 Hz, 1H), 4.23 (q,  $J$  = 6.8 Hz, 2H), 3.90 (t,  $J$  = 11.4 Hz, 2H), 3.70 (d,  $J$  = 11.4 Hz, 2H), 3.47 (t,  $J$  = 11.4 Hz, 2H), 2.19 (d, 11.4 Hz, 2H), 1.12 (t,  $J$  = 6.8 Hz, 3H) ppm;  $^{13}\text{C}$  NMR (100 MHz,  $\text{C}_6\text{D}_6$ )  $\delta$  = 164.74, 134.59, 121.93, 120.24, 118.10, 113.89, 111.42, 100.61, 68.14, 60.17, 49.91, 14.57 ppm;

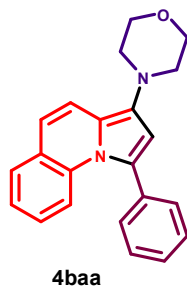

4-(1-phenylpyrrolo[1,2-a]quinolin-3-yl)morpholine (**4baa**) [Ref 2]: Yellow oil.  $^1\text{H}$  NMR (400 MHz,  $\text{C}_6\text{D}_6$ )  $\delta$  = 7.58 (d,  $J$  = 8.4 Hz, 1H), 7.43 (d,  $J$  = 9.2 Hz, 1H), 7.34 (d,  $J$  = 6.8 Hz, 3H), 7.13-7.09 (m, 3H), 6.93 (t,  $J$  = 7.3 Hz, 1H), 6.78 (t,  $J$  = 7.6 Hz, 1H), 6.72 (d,  $J$  = 9.9 Hz, 1H), 6.5 (s, 1H), 3.74 (t,  $J$  = 4.6 Hz, 4H), 2.87 (t,  $J$  = 4.6 Hz, 4H) ppm;  $^{13}\text{C}$  NMR (100 MHz,  $\text{C}_6\text{D}_6$ )  $\delta$ : 136.27, 134.64, 132.29, 129.55, 128.79, 128.70, 126.49, 124.88, 123.60, 118.15, 117.76, 117.21, 109.12, 67.50, 54.72 ppm.

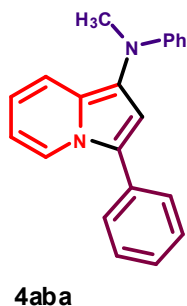

*N*-Methyl-*N*,3-diphenylindolizin-1-amine (**4aba**) [Ref 1]: Yellow oil.  $^1\text{H}$  NMR (400 MHz,  $\text{C}_6\text{D}_6$ )  $\delta$  = 7.94 (d,  $J$  = 7.6 Hz, 1H), 7.33 (d,  $J$  = 7.6 Hz, 2H), 7.22-7.17 (m, 3H), 7.10 (t,  $J$  = 8.6 Hz, 2H), 6.84 (d,  $J$  = 9.1 Hz, 2H), 6.79 (d,  $J$  = 6.8 Hz, 1H), 6.69 (s, 1H), 6.28 (t,  $J$  = 7.6 Hz, 1H), 6.00 (t,  $J$  = 6.8 Hz, 1H), 3.12 (s, 3H) ppm;  $^{13}\text{C}$  NMR (100 MHz,  $\text{C}_6\text{D}_6$ )  $\delta$  = 150.80, 132.71, 129.31, 129.23, 127.24, 124.17, 123.70, 122.30, 117.96, 117.52, 116.78, 113.74, 112.54, 111.20, 40.72 ppm.



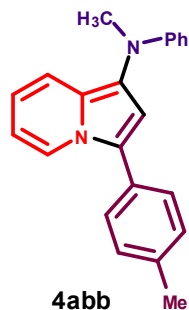

*N*-Methyl-*N*-phenyl-3-*p*-tolylindolizin-1-amine (**4abb**) [Ref 1]: Yellow oil.  $^1\text{H}$  NMR (400 MHz,  $\text{C}_6\text{D}_6$ )  $\delta$  = 7.95 (d,  $J$  = 6.8 Hz, 1H), 7.29 (d,  $J$  = 7.6 Hz, 2H), 7.21 (t,  $J$  = 7.6 Hz, 2H), 7.13 (d,  $J$  = 8.3 Hz, 2H), 7.01 (d,  $J$  = 8.3 Hz, 2H), 6.85 (d,  $J$  = 7.6 Hz, 2H), 6.80 (t,  $J$  = 7.6 Hz, 1H), 6.71 (s, 1H), 6.29 (t,  $J$  = 7.6 Hz, 1H), 6.02 (t,  $J$  = 6.8 Hz, 1H), 3.13 (s, 3H), 2.14 (s, 3H) ppm;  $^{13}\text{C}$  NMR (100 MHz,  $\text{C}_6\text{D}_6$ )  $\delta$  = 150.77, 136.88, 129.85, 129.23, 124.21, 123.53, 122.29, 117.88, 117.37, 116.45, 113.65, 113.38, 112.15, 110.98, 40.67, 21.18 ppm.

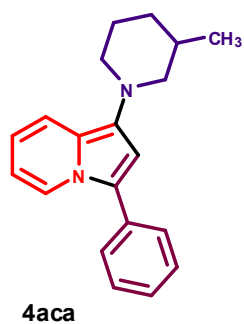

1-(3-Methylpiperidin-1-yl)-3-phenylindolizine (**4aca**) [Ref 1]: Yellow oil.  $^1\text{H}$  NMR (400 MHz,  $\text{C}_6\text{D}_6$ )  $\delta$  = 7.94 (d,  $J$  = 6.8 Hz, 1H), 7.58 (d,  $J$  = 8.4 Hz, 1H), 7.38 (d,  $J$  = 7.6 Hz, 2H), 7.19 (t,  $J$  = 7.6 Hz, 2H), 7.08 (t,  $J$  = 7.6 Hz, 1H), 6.76 (s, 1H), 6.35 (t,  $J$  = 7.6 Hz, 1H), 6.04 (t,  $J$  = 6.8 Hz, 1H), 3.27-3.23 (m, 2H), 2.63 (t,  $J$  = 11.4 Hz, 1H), 2.37 (t,  $J$  = 10.6 Hz, 1H), 1.92-1.79 (m, 2H), 1.70-1.59 (m, 3H), 0.86 (d,  $J$  = 6.8 Hz, 3H) ppm;  $^{13}\text{C}$  NMR (100 MHz,  $\text{C}_6\text{D}_6$ )  $\delta$  = 133.86, 130.36, 127.71, 125.37, 124.75, 120.32, 117.05, 113.19, 109.59, 105.30, 76.29, 61.61, 53.79, 31.91, 30.56, 25.16, 18.33 ppm.



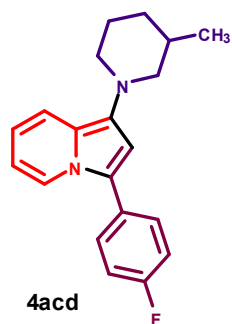

3-(4-Fluorophenyl)-1-(3-methylpiperidin-1-yl)indolizine (**4acd**) [Ref 1]: Yellow oil.  $^1\text{H}$  NMR (400 MHz,  $\text{C}_6\text{D}_6$ )  $\delta$  = 7.74 (d,  $J$  = 7.6 Hz, 1H), 7.57 (d,  $J$  = 8.3 Hz, 1H), 7.09 (t,  $J$  = 6.8 Hz, 2H), 6.83 (t,  $J$  = 8.3 Hz, 2H), 6.65 (s, 1H), 6.35 (t,  $J$  = 7.6 Hz, 1H), 6.05 (t,  $J$  = 7.6 Hz, 1H), 3.27-3.25 (m, 2H), 2.64 (t,  $J$  = 11.4 Hz, 1H), 2.38 (t,  $J$  = 10.6 Hz, 1H), 1.93-1.77 (m, 2H), 1.71-1.60 (m, 2H), 0.99-0.92 (m, 1H), 0.87 (d,  $J$  = 6.8 Hz, 3H) ppm;  $^{13}\text{C}$  NMR (100 MHz,  $\text{C}_6\text{D}_6$ )  $\delta$  = 162.09 (d,  $^1J_{\text{C-F}}$  = 245.3 Hz), 131.75, 129.92 (d,  $^3J_{\text{C-F}}$  = 7.6 Hz), 129.30 (d,  $^4J_{\text{C-F}}$  = 2.8 Hz), 126.03, 121.62, 121.51, 118.52, 116.06 (d,  $^2J_{\text{C-F}}$  = 21.0 Hz), 114.61, 111.12, 106.71, 63.05, 55.29, 33.35, 32.02, 26.54, 19.78 ppm.

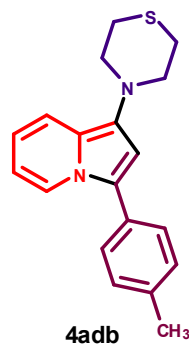

4-(3-p-Tolylindolizin-1-yl)thiomorpholine (**4adb**) [Ref 1]: Yellow oil.  $^1\text{H}$  NMR (400 MHz,  $\text{C}_6\text{D}_6$ )  $\delta$  = 7.95 (d,  $J$  = 6.8 Hz, 1H), 7.42 (d,  $J$  = 8.4 Hz, 1H), 7.30 (d,  $J$  = 8.4 Hz, 2H), 7.03 (d,  $J$  = 7.6 Hz, 2H), 6.68 (s, 1H), 6.35 (t,  $J$  = 7.6 Hz, 1H), 6.05 (t,  $J$  = 7.6 Hz, 1H), 3.14 (t,  $J$  = 4.5 Hz, 4H), 2.60 (t,  $J$  = 4.5 Hz, 4H), 2.16 (s, 3H) ppm;  $^{13}\text{C}$  NMR (100 MHz,  $\text{C}_6\text{D}_6$ )  $\delta$  = 136.67, 131.46, 130.19, 129.90, 126.20, 123.17, 121.90, 118.08, 114.94, 111.02, 107.04, 56.63, 28.84, 21.18 ppm.



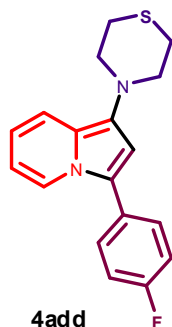

4-(3-(4-Fluorophenyl)indolizin-1-yl)thiomorpholine (**4add**) [Ref 1]: Yellow oil.  $^1\text{H}$  NMR (400 MHz,  $\text{C}_6\text{D}_6$ )  $\delta$  = 7.71 (d,  $J$  = 7.6 Hz, 1H), 7.40 (d,  $J$  = 7.6 Hz, 1H), 7.06 (dd,  $J$  = 8.3 Hz,  $J$  = 5.3 Hz, 2H), 6.83 (t,  $J$  = 8.3 Hz, 2H), 6.53 (s, 1H), 6.36 (t,  $J$  = 7.6 Hz, 1H), 6.05 (t,  $J$  = 6.8 Hz, 1H), 3.12 (t,  $J$  = 5.3 Hz, 4H), 2.60 (t,  $J$  = 4.5 Hz, 4H) ppm;  $^{13}\text{C}$  NMR (100 MHz,  $\text{C}_6\text{D}_6$ )  $\delta$  = 162.04 (d,  $^1J_{\text{C-F}}$  = 247.2 Hz), 131.28, 129.90 (d,  $^3J_{\text{C-F}}$  = 8.6 Hz), 128.93 (d,  $^4J_{\text{C-F}}$  = 3.8 Hz), 126.14, 121.63, 121.51, 117.97, 116.02 (d,  $^2J_{\text{C-F}}$  = 22.0 Hz), 115.10, 111.16, 107.14, 56.51, 28.74 ppm.

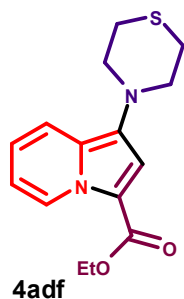

Ethyl 1-thiomorpholinoindolizine-3-carboxylate (**4adf**) [Ref 1]: White solid. m.p: 124-126 °C.  $^1\text{H}$  NMR (400 MHz,  $\text{C}_6\text{D}_6$ )  $\delta$  = 7.80 (d,  $J$  = 6.8 Hz, 1H), 7.01 (s, 1H), 7.00 (d,  $J$  = 8.3 Hz, 1H), 6.33 (t,  $J$  = 7.6 Hz, 1H), 6.16 (t,  $J$  = 6.8 Hz, 1H), 4.23 (q,  $J$  = 6.8 Hz, 2H), 3.83 (t,  $J$  = 11.4 Hz, 2H), 2.67 (t,  $J$  = 11.4 Hz, 2H), 2.57 (d,  $J$  = 11.4 Hz, 2H), 2.08 (d,  $J$  = 11.4 Hz, 2H), 1.13 (t,  $J$  = 6.8 Hz, 3H) ppm;  $^{13}\text{C}$  NMR (100 MHz,  $\text{C}_6\text{D}_6$ )  $\delta$  = 164.34, 135.31, 121.55, 119.93, 117.72, 113.37, 111.12, 100.10, 59.84, 51.71, 29.00, 14.25 ppm.



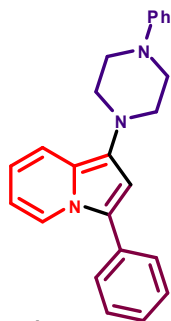

**4aea**

3-Phenyl-1-(4-phenylpiperazin-1-yl)indolizine (**4aea**) [Ref 1]: Yellow oil.  $^1\text{H}$  NMR (400 MHz,  $\text{C}_6\text{D}_6$ )  $\delta$  = 7.50-7.44 (m, 2H), 7.41-7.37 (m, 4H), 7.33 (d,  $J$  = 7.6 Hz, 1H), 7.22 (t,  $J$  = 7.6 Hz, 3H), 6.93 (d,  $J$  = 7.6 Hz, 2H), 6.80 (t,  $J$  = 6.8 Hz, 1H), 6.65 (s, 1H), 3.33 (t,  $J$  = 4.5 Hz, 4H), 3.26-3.07 (m, 4H) ppm;  $^{13}\text{C}$  NMR (100 MHz,  $\text{C}_6\text{D}_6$ )  $\delta$  = 152.11, 133.03, 130.41, 129.34, 129.14, 128.92, 126.97, 126.19, 122.98, 121.83, 119.80, 118.22, 116.54, 114.95, 111.09, 106.56, 54.23, 49.88 ppm.

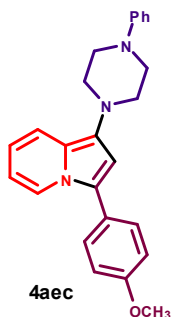

**4aec**

3-(4-Methoxyphenyl)-1-(4-phenylpiperazin-1-yl)indolizine (**4aec**) [Ref 1]: Yellow oil.  $^1\text{H}$  NMR (400 MHz,  $\text{C}_6\text{D}_6$ )  $\delta$  = 7.92 (d,  $J$  = 7.3 Hz, 1H), 7.55 (d,  $J$  = 8.7 Hz, 1H), 7.30 (d,  $J$  = 8.7 Hz, 2H), 7.25 (t,  $J$  = 7.3 Hz, 2H), 6.88 (d,  $J$  = 8.2 Hz, 3H), 6.83 (d,  $J$  = 8.7 Hz, 2H), 6.74 (s, 1H), 6.39 (t,  $J$  = 7.3 Hz, 1H), 6.10 (t,  $J$  = 6.8 Hz, 1H), 3.35 (s, 3H), 3.18-3.15 (m, 4H), 3.09-3.07 (m, 4H) ppm;  $^{13}\text{C}$  NMR (100 MHz,  $\text{C}_6\text{D}_6$ )  $\delta$  = 159.22, 152.12, 130.17, 129.79, 129.34, 125.63, 125.43, 122.88, 121.77, 119.75, 118.22, 116.52, 114.69, 114.52, 110.89, 106.12, 54.85, 54.30, 49.88 ppm.

## References

1. U. C. RaJesh, G. Purohit, and D. S. Rawat, *ACS Sustainable Chem. Eng.* **2015**, *3*, 2397.
2. S. Mishra, A. K. Bagdi, M. Ghosh, S. Sinha and A. HaJra, *RSC Adv.* **2014**, *4*, 6672.







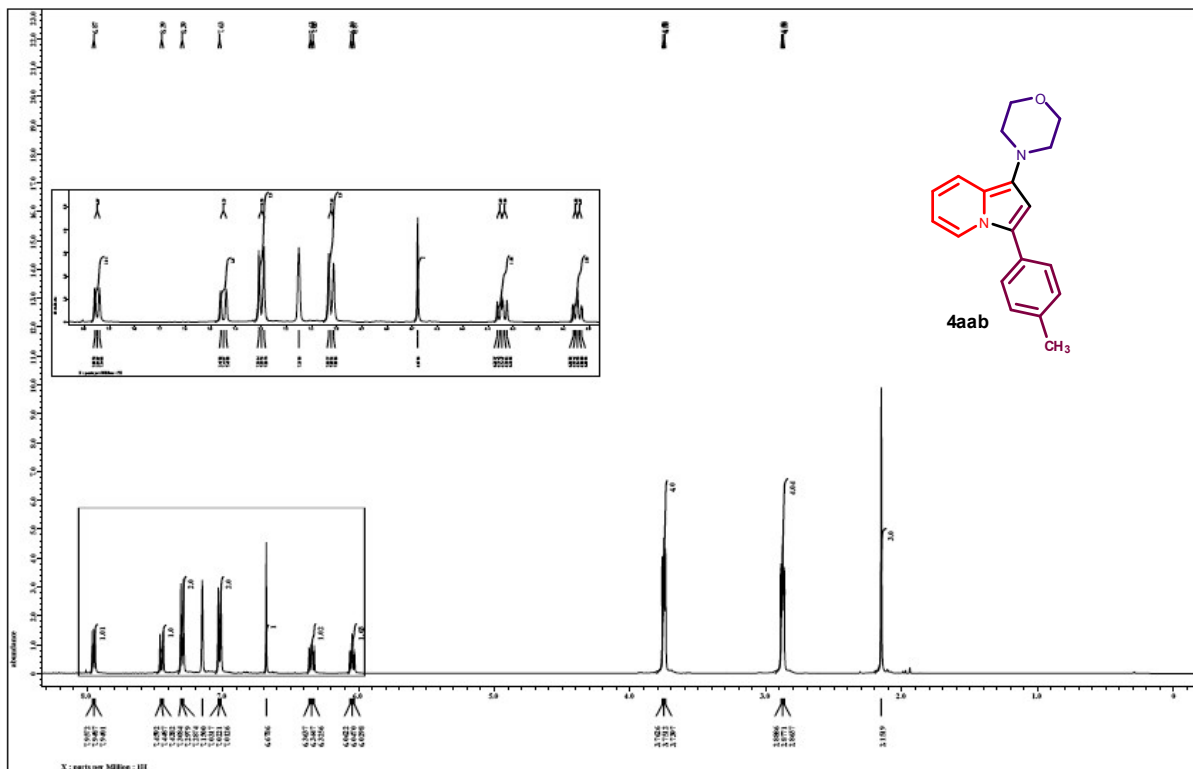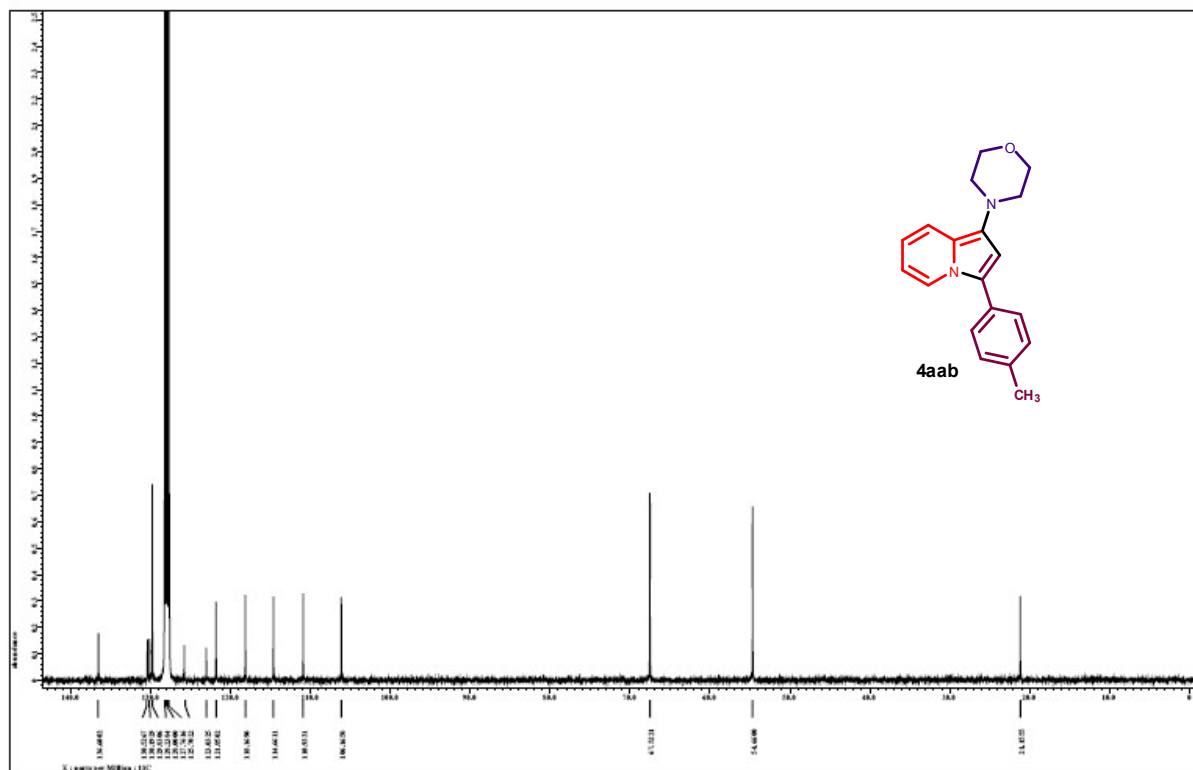











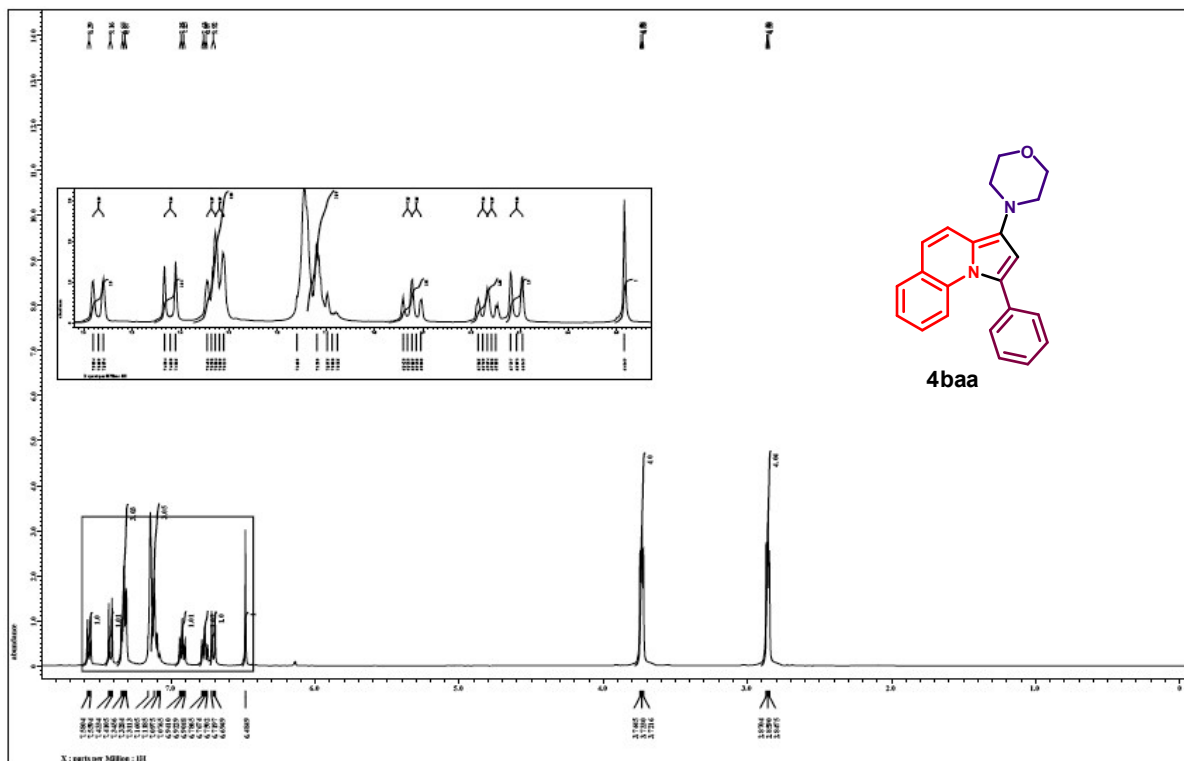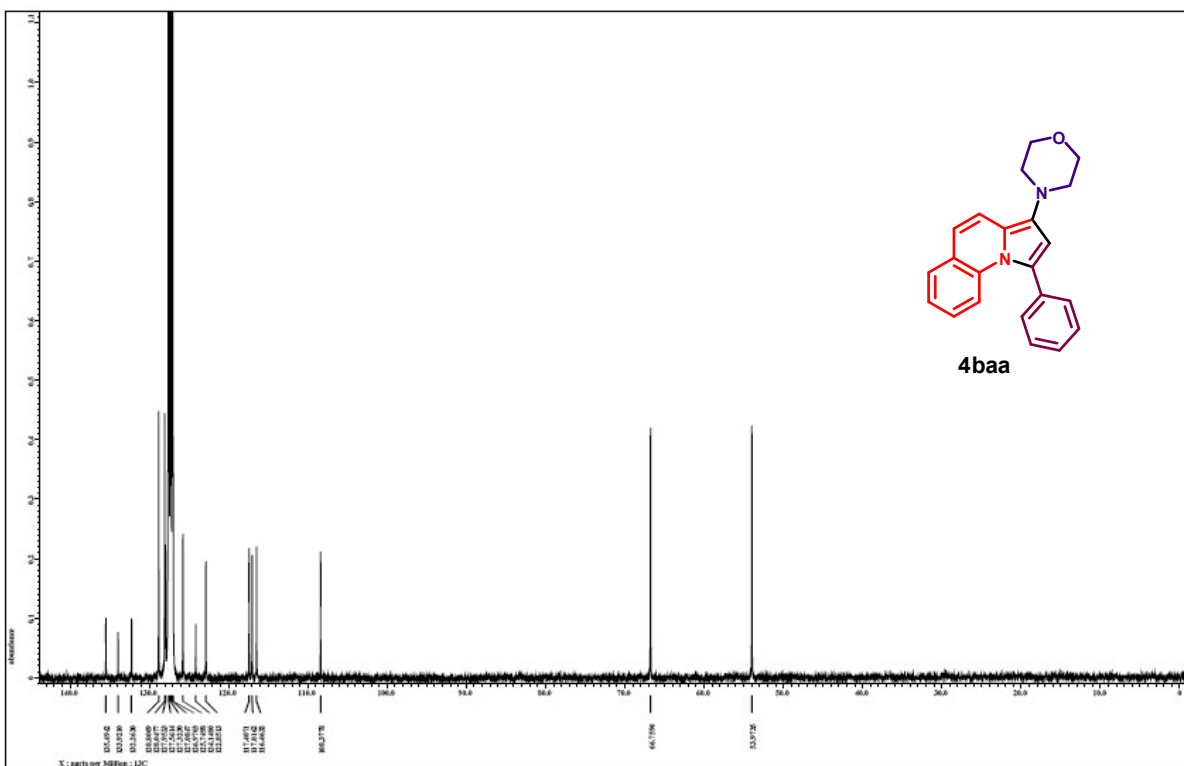



















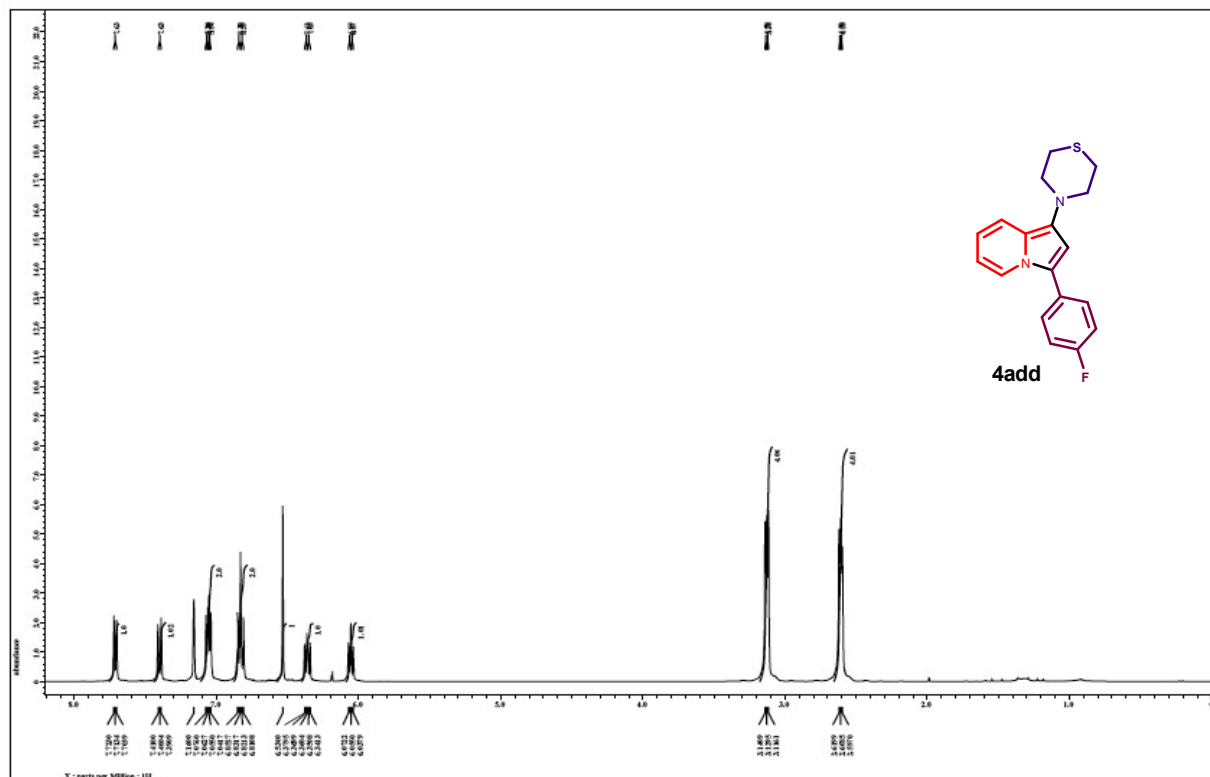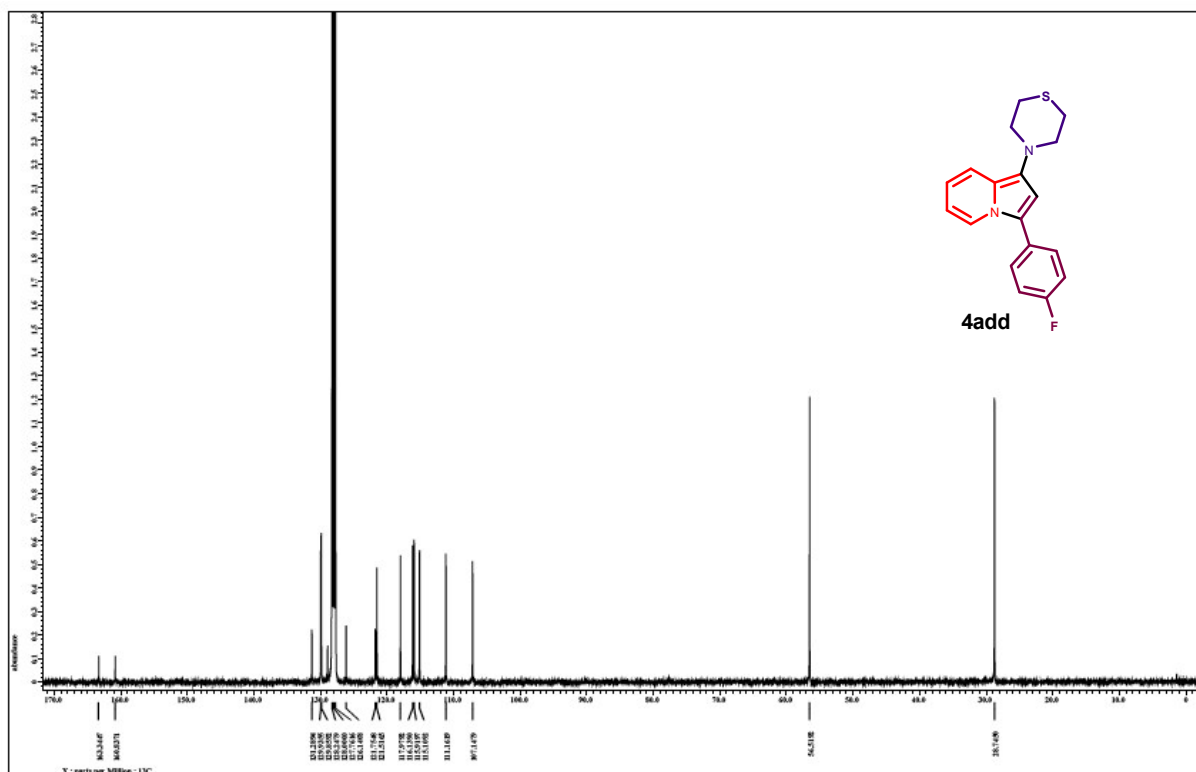







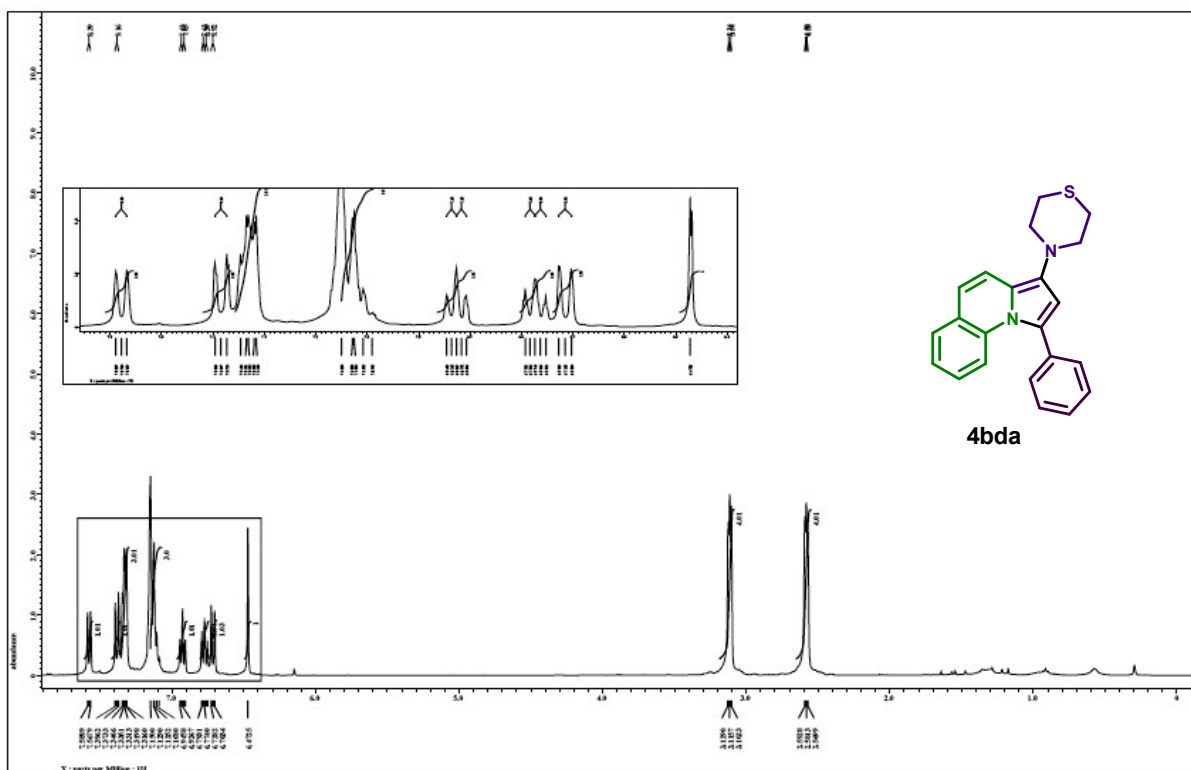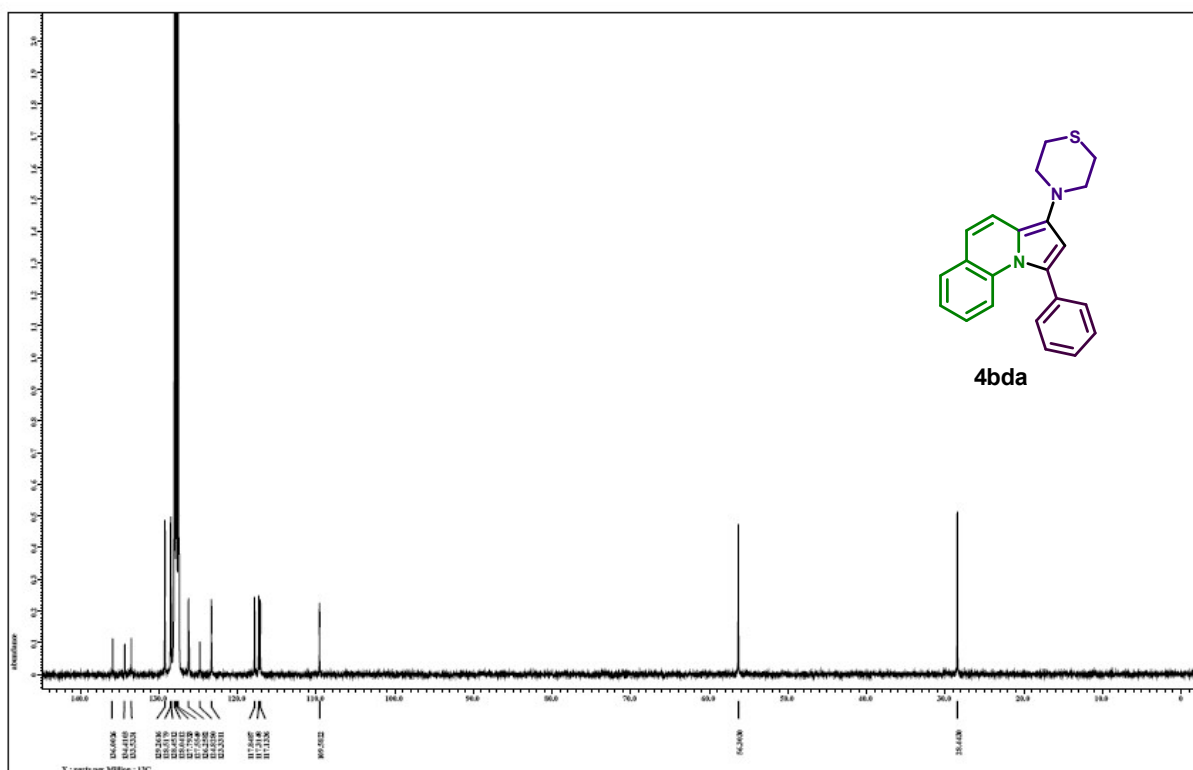











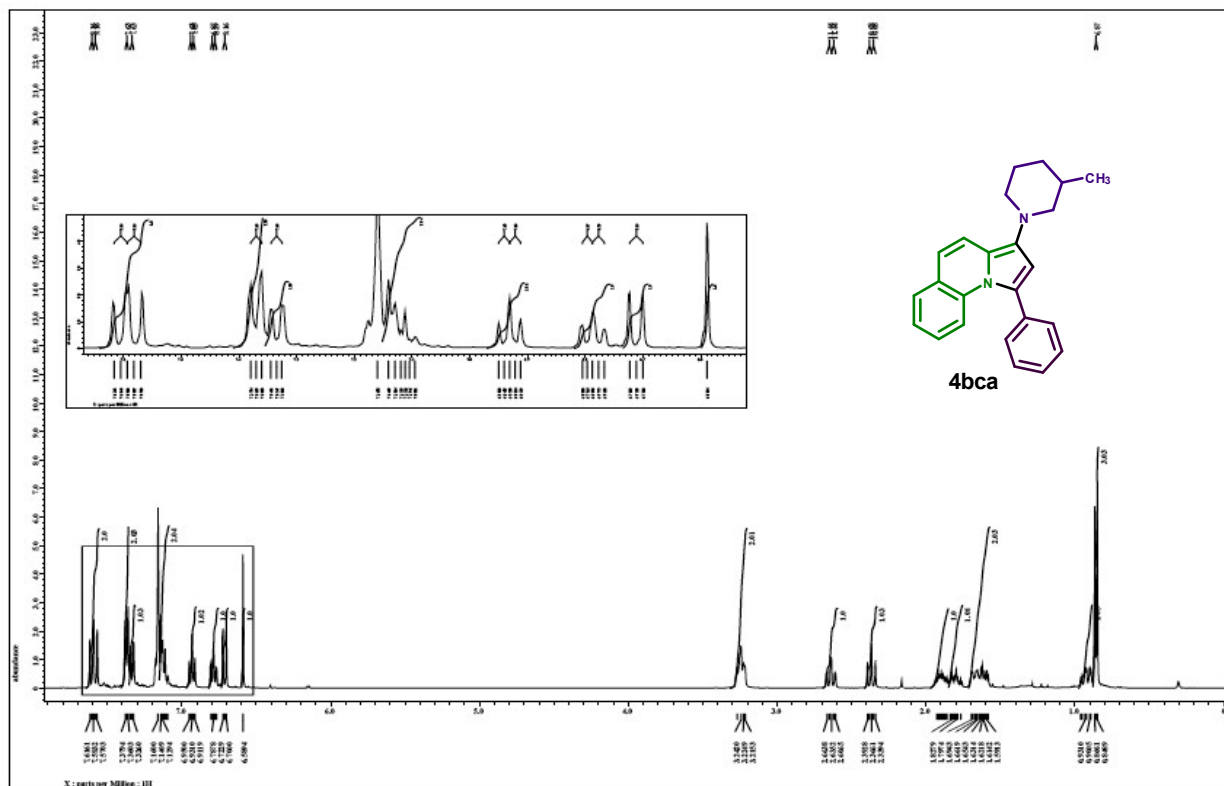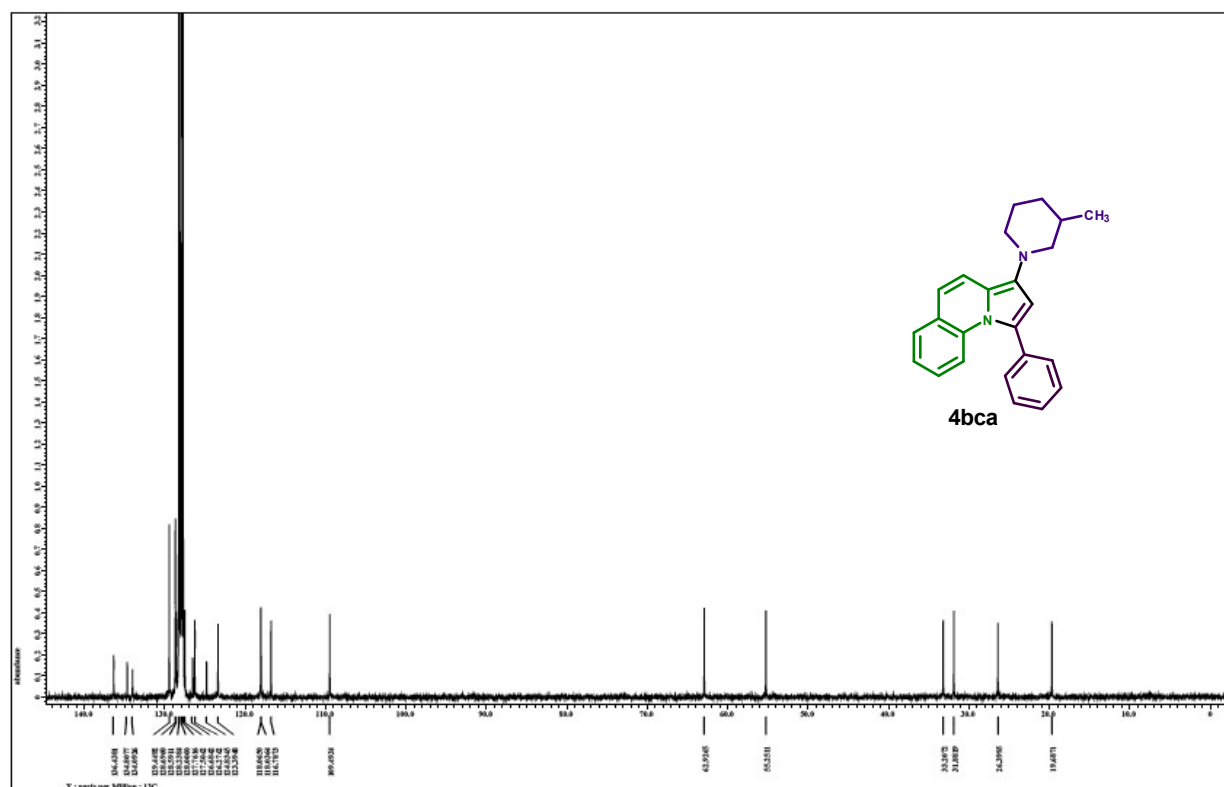



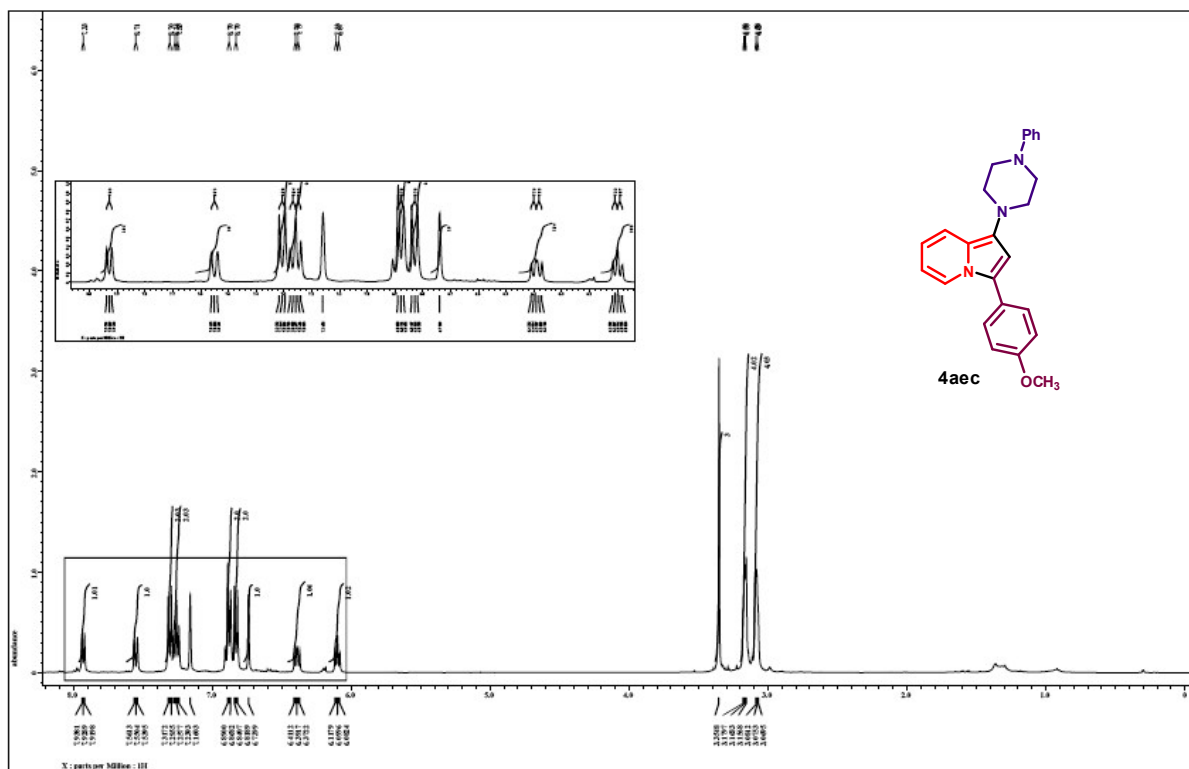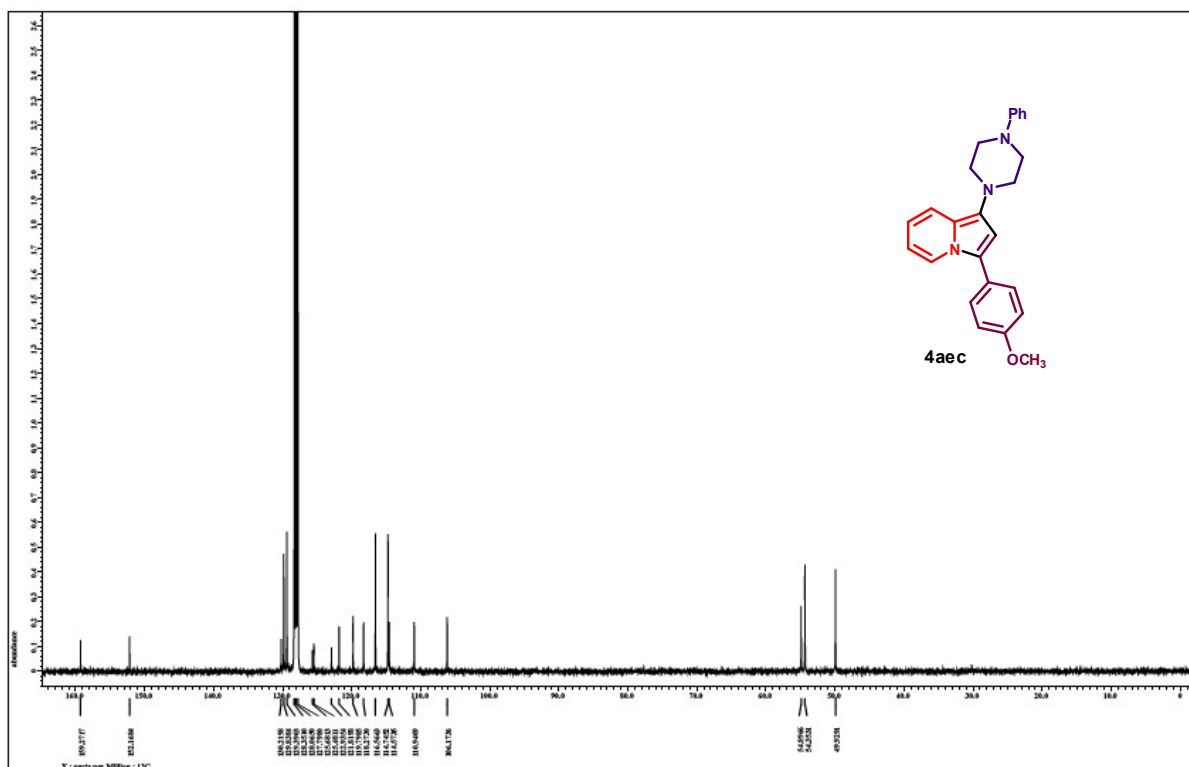











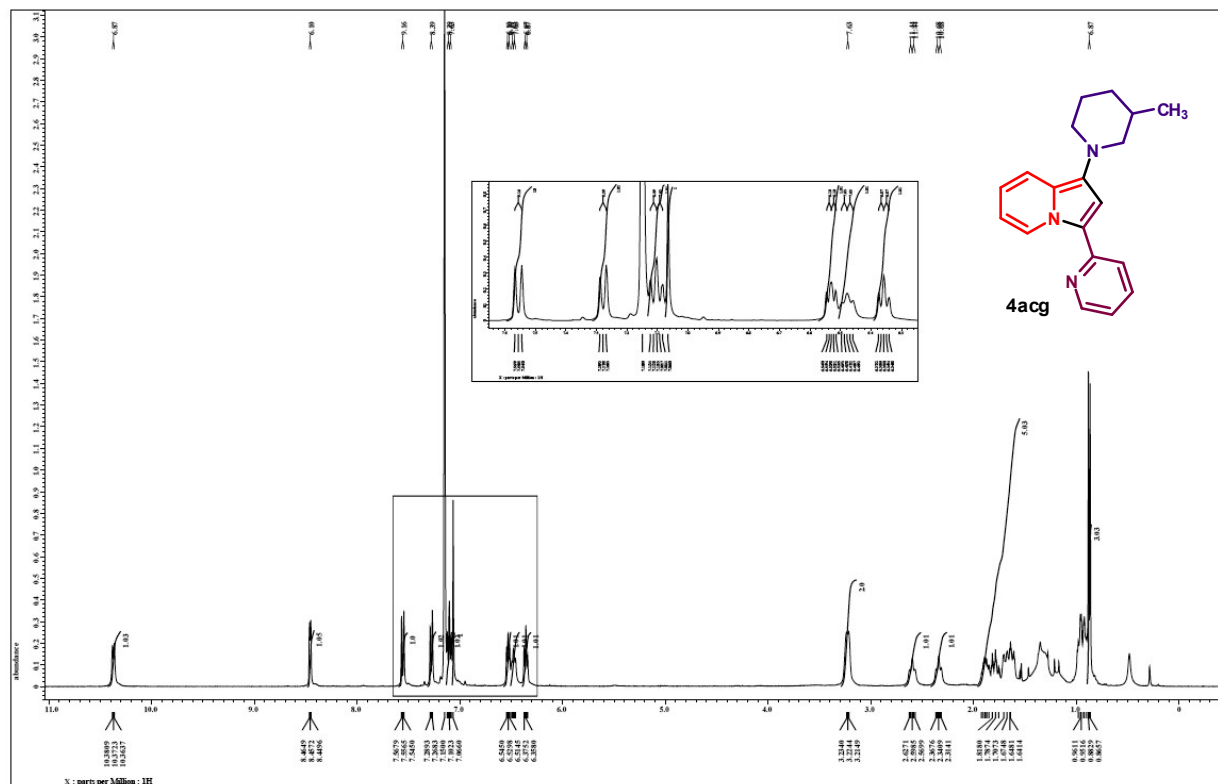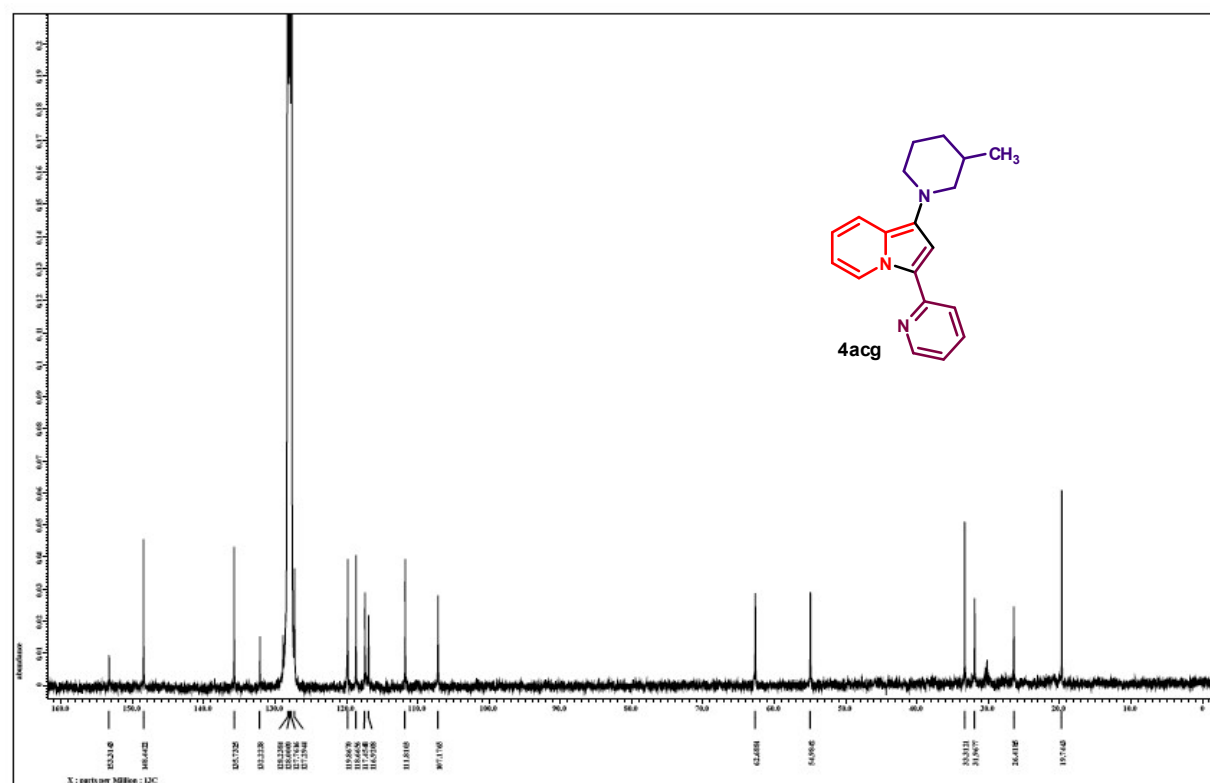

Supplement: c5ra20718e1.pdf [file c5ra20718e1.pdf]
